# Supplementary material
Source: PubMed Central journal article supplement (PMC5999231)
Supplement: an8b00234_si_001.pdf [file an8b00234_si_001.pdf]

## *Supporting Information*

# **Rapid Recovery of Clofazimine-loaded Nanoparticles with Extended Shelf Life as Anti-Cryptosporidium Therapy**

Jie Feng<sup>1</sup>, Yingyue Zhang<sup>1</sup>, Simon A. McManus<sup>1</sup>, Kurt D. Ristroph<sup>1</sup>, Hoang D. Lu<sup>1</sup>, Kai Gong<sup>2</sup>,  
Claire E. White<sup>2,3</sup>, Robert K. Prud'homme<sup>1\*</sup>

*1. Department of Chemical and Biological Engineering, Princeton University, Princeton, New Jersey 08544, United States*

*2. Department of Civil and Environmental Engineering, Princeton University, Princeton, New Jersey 08544, United States*

*3. Andlinger Center for Energy and the Environment, Princeton University, Princeton, New Jersey 08544, United States*

## Information of AFFINSOL™ HPMCAS

Table S1. Physical properties of Dow AFFINSOL™ HPMCAS from <https://www.dow.com/en-us/pharma/products/affinisol>

| AFFINSOL™ HPMCAS       |            |            |            |
|------------------------|------------|------------|------------|
|                        | 716        | 912        | 126        |
| Hydroxypropyl          | 5.0-9.0%   | 5.0-9.0%   | 6.0-10.0%  |
| Methoxyl               | 20.0-24.0% | 21.0-25.0% | 22.0-26.0% |
| Viscosity*             | 2.4-3.6 cP | 2.4-3.6 cP | 2.4-3.6 cP |
| Free Acids             | <1.0%      | <1.0%      | <1.0%      |
| Acetate Substitution   | 5.0-9.0%   | 7.0-11.0%  | 10.0-14.0% |
| Succinate Substitution | 14.0-18.0% | 10.0-14.0% | 4.0-8.0%   |
| Acetic Acid            | 0.5%       | 0.5%       | 0.5%       |

## Calculation of effective Reynolds number for MIVM

The definition of effective Reynolds number is

$$Re = \sum_{i=1}^4 \frac{U_i D_i}{\nu_i} , \quad (1)$$

where  $\rho_i$  is the density,  $U_i$  is the velocity,  $\nu_i$  is the kinematic viscosity of stream  $i$ , and  $D_i$  is the characteristic dimension [1]. The current MIVM set-up has a cross-section area of each inlet as  $1.1 \times 1.5 \text{ mm}^2$  and the diameter of the mixing geometry as  $D_i=6 \text{ mm}$ . Regarding the HPMCAS and lecithin formulations, the total flow rate is 160 mL/and 120 mL/min, respectively, with volumetric flow rate of organic:water=1:3. Tables S2 and S3 list the flow velocities and

kinematic viscosities of each stream for HPMCAS and lecithin NPs. Therefore, the effective Reynolds numbers are  $Re=8.8\times 10^3$  and  $1.2\times 10^4$  for HPMCAS and lecithin, respectively.

Table S2. Velocity and kinematic viscosity of each stream for the formulation of HPMCAS NPs

|                             | Organic stream 1     | Aqueous stream 2     | Aqueous stream 3     | Aqueous stream 4     |
|-----------------------------|----------------------|----------------------|----------------------|----------------------|
| $U_i$ (m/s)                 | 0.16                 | 0.48                 | 0.48                 | 0.48                 |
| $\nu_i$ (m <sup>2</sup> /s) | $0.38\times 10^{-6}$ | $0.89\times 10^{-6}$ | $0.89\times 10^{-6}$ | $0.89\times 10^{-6}$ |

Table S3. Velocity and kinematic viscosity of each stream for the formulation of lecithin NPs

|                             | Organic stream 1     | Aqueous stream 2     | Aqueous stream 3     | Aqueous stream 4     |
|-----------------------------|----------------------|----------------------|----------------------|----------------------|
| $U_i$ (m/s)                 | 0.12                 | 0.36                 | 0.36                 | 0.36                 |
| $\nu_i$ (m <sup>2</sup> /s) | $0.54\times 10^{-6}$ | $0.89\times 10^{-6}$ | $0.89\times 10^{-6}$ | $0.89\times 10^{-6}$ |

### Calculation for $Pe$ at the spray-drying process for HPMCAS and lecithin nanoparticles

In the spray-drying process, the Péclet number is defined as [2]

$$Pe = \frac{d^2}{4D\tau_{dry}} , \quad (2)$$

where  $d$  is the radius of the droplet in the spray dryer,  $D$  is the diffusion coefficient of the solute or NPs, and  $\tau_{dry}$  is the time required for a droplet to dry. We estimate  $\tau_{dry}$  with the aspirator setting for a gas flow rate of 35 m<sup>3</sup>/h. Since the drying chamber has a cross-section diameter of 0.16 m and a length of 0.5 m, the flow velocity is 0.5 m/s and hence  $\tau_{dry}\approx O(1)$  s in the SD conditions for both formulations. Additionally,  $D$  is calculated using Stokes-Einstein equation as

$$D = \frac{k_B T}{6\pi\mu R_H} , \quad (3)$$

where  $k_B$  is the Boltzmann's constant,  $T$  is the absolute temperature ( $\approx 360$  K),  $\mu$  is the viscosity of the solvent ( $\approx 8.9 \times 10^{-4}$  Pa·s, ) and  $R_H$  is the hydrodynamic radius of the solute ( $\approx 10$  nm for HPMC E3 [3],  $\approx 1$  nm for mannitol) or NPs ( $\approx 150$  and  $432$  nm for HPMCAS and lecithin NPs, respectively).

Assuming that one final dry particle results from the drying of one droplet and there is no coalescence of the droplets during spray drying, we can estimate  $d$  by mass conservation as follows:

$$\rho_l d^3 = \rho_s d_{90}^3 \quad , \quad (4)$$

where  $\rho_l$  is the density of the NP dispersion ( $\approx 1 \times 10^3$  kg/m<sup>3</sup>),  $\rho_s$  is the density of the dry powder (estimated by the density of clofazimine,  $\approx 1.3 \times 10^3$  kg/m<sup>3</sup>) and  $d_{90\%}$  is the diameter at which 90% of the total particle volume is comprised of particles of diameter  $d_{90\%}$  ( $\approx 9.1$  and  $8.4$   $\mu\text{m}$  for spray-dried HPMCAS and lecithin NPs, respectively). Therefore, using equations (2-4),  $Pe \approx O(1-10)$  for HPMC E3 and mannitol, while  $Pe \approx O(10^{2-3})$  for HPMCAS and lecithin NPs.

### **Clofazimine calibration curves in THF, FaSSGF, FaSSIF and FeSSIF**

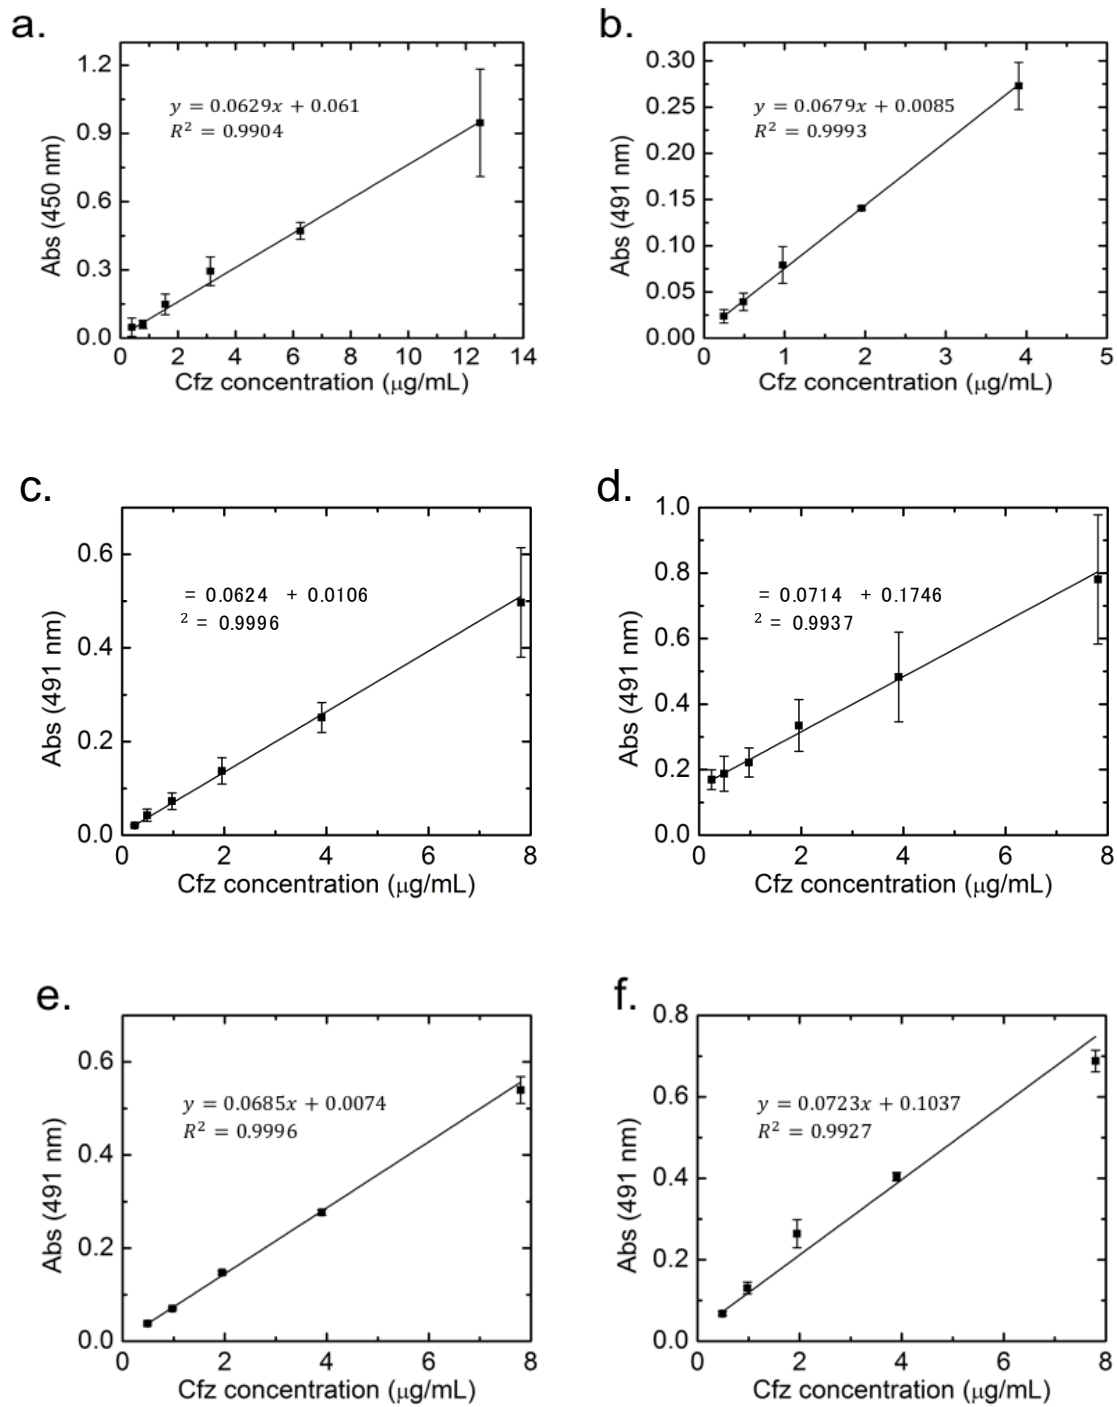

Figure S1. Clofazimine calibration curves in (a) THF, (b) FaSSGF, (c) FaSSIF, (d) FeSSIF, (e) FaSSGF:FaSSIF=1:9, and (f) FaSSGF:FeSSIF=1:9

## Residual moisture for spray-dried HPMCAS and lecithin NPs in the long-term storage

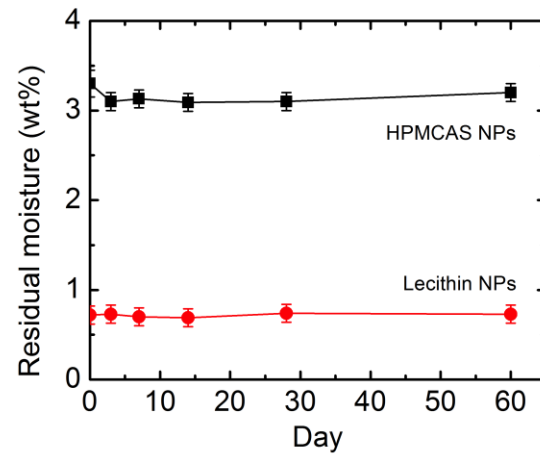

Figure S2. Residual moisture for spray-dried HPMCAS and Lecithin NPs stability study

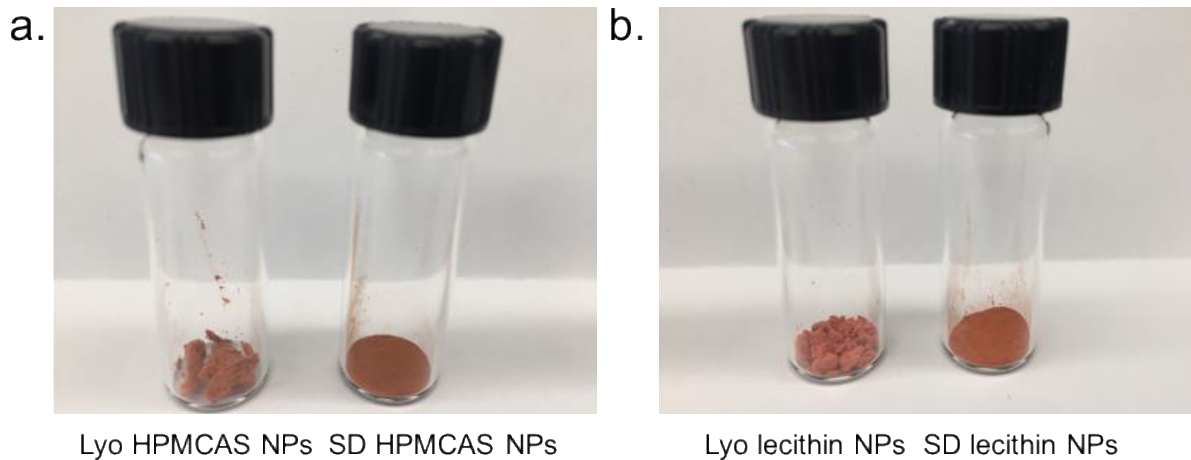

Figure S3. Appearance of lyophilized and spray-dried (a) HPMCAS and (b) lecithin nanoparticles

### Appearance of lyophilized and spray-dried nanoparticles

### Compressed mini-tablet test

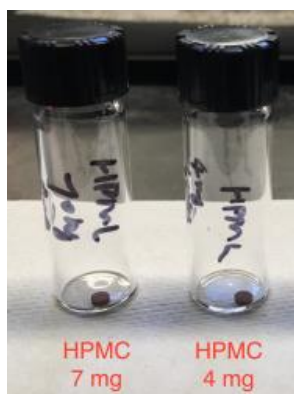

Figure S4. Appearance of the mini-tablet for spray-dried HPMCAS NPs

### References:

1. Liu, Y., C.Y. Cheng, Y. Liu, R.K. Prud'homme, and R.O. Fox, Mixing in a Multi-Inlet Vortex Mixer (Mivm) for Flash Nano-Precipitation. Chem Eng Sci, 2008. **63**: 2829-2842.

2. Tsapis, N., D. Bennett, B. Jackson, D.A. Weitz, and D.A. Edwards, Trojan Particles: Large Porous Carriers of Nanoparticles for Drug Delivery. *P Natl Acad Sci USA*, 2002. **99**: 12001-12005.
3. Huang, W.J., T. Mandal, and R.G. Larson, Computational Modeling of Hydroxypropyl-Methylcellulose Acetate Succinate (Hpmcas) and Phenytoin Interactions: A Systematic Coarse-Graining Approach. *Mol Pharmaceut*, 2017. **14**: 733-745.
